# Supplementary material for: Complex haploinsufficiency in pluripotent cells yields somatic cells with DNA methylation abnormalities and pluripotency induction defects
Source: Stem Cell Reports. 2023 Oct 12;18(11):2174–89. doi: 10.1016/j.stemcr.2023.09.009 (PMC10679652; doi:10.1016/j.stemcr.2023.09.009)
Supplement: Document S1. Figures S1–S6 and Table S2 [file mmc1.pdf]

**Supplemental Information**

**Complex haploinsufficiency in pluripotent cells yields somatic cells with DNA methylation abnormalities and pluripotency induction defects**

**Rachel Lasry, Noam Maoz, Albert W. Cheng, Nataly Yom Tov, Elisabeth Kulenkampff, Meir Azagury, Hui Yang, Cora Ople, Styliani Markoulaki, Dina A. Faddah, Kirill Makedonski, Dana Orzech, Ofra Sabag, Rudolf Jaenisch, and Yosef Buganim**

RESULTS

Figure S1

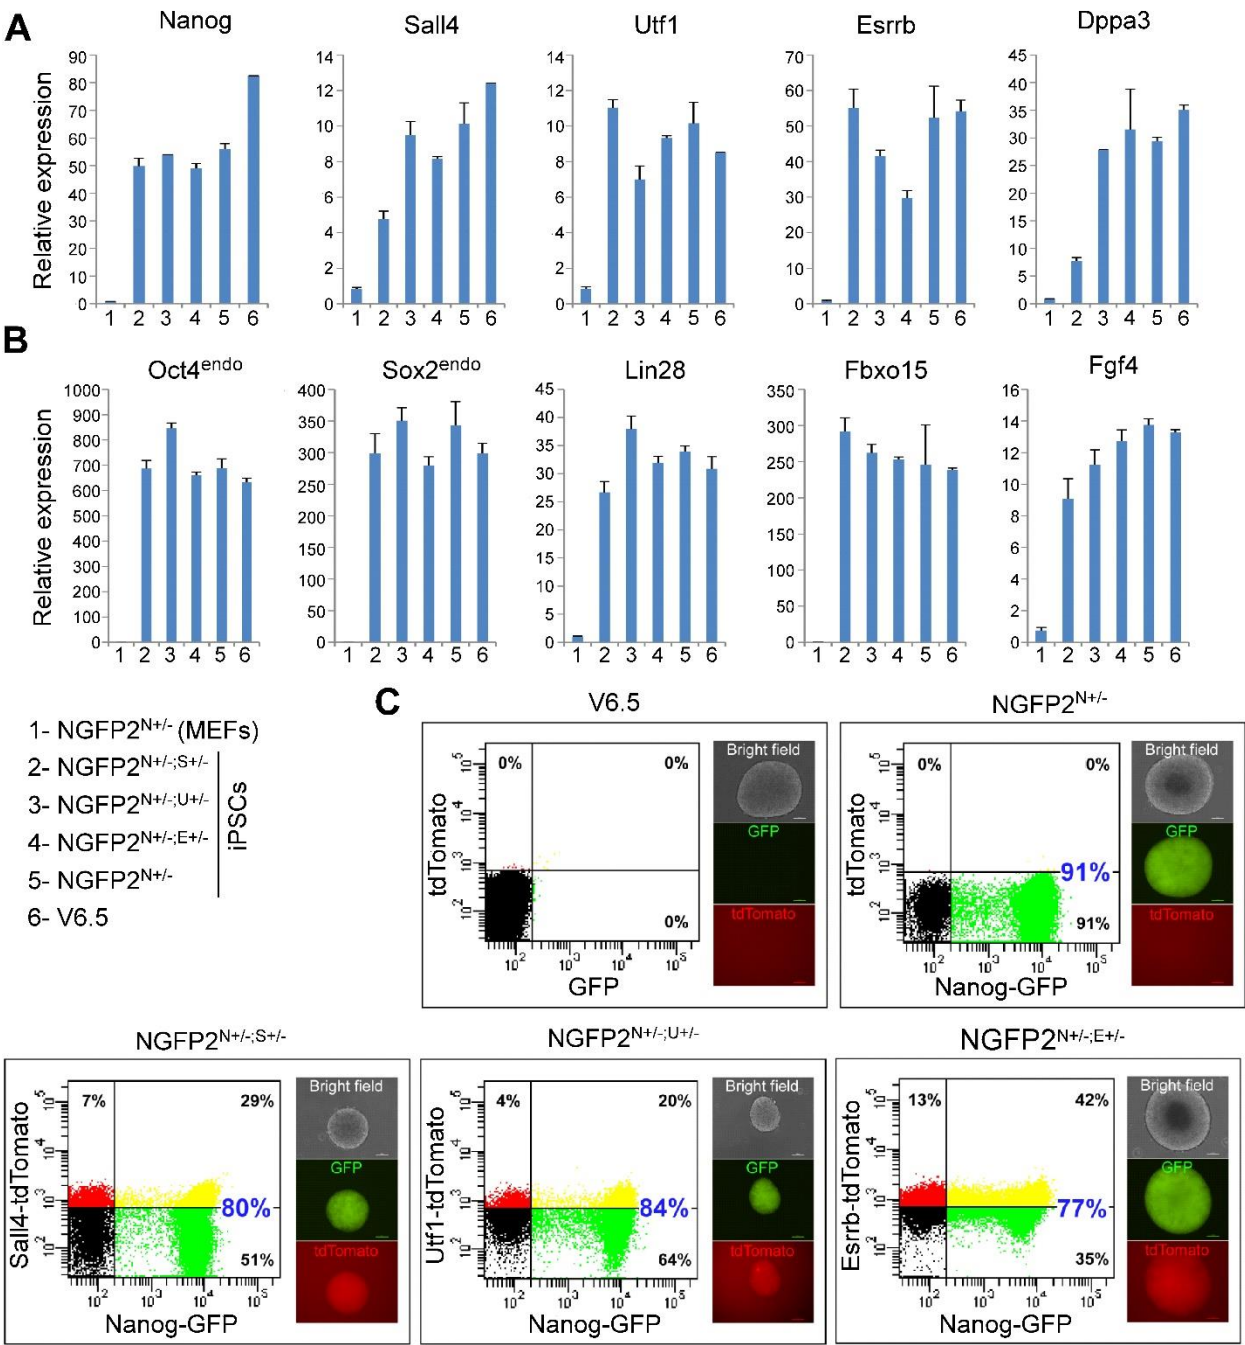

**Figure S1. Characterization of the double heterozygous mutant NGFP2<sup>N+/-</sup> lines, related to main Figure 1. (A, B)** qPCR of the indicated genes normalized to the housekeeping control gene *Gapdh* in the various NGFP2<sup>N+/-</sup> double heterozygous mutant lines, NGFP2<sup>N+/-</sup> parental line, and ESC (V6.5) and MEF. Error bars presented as a mean  $\pm$  SD of 2 duplicate runs from a typical experiment out of 3 independent experiments (n= 3). **(C)** Flow cytometry analysis for GFP (*Nanog*) and tdTomato (*Utf1*, *Esrrb* or *Sall4*) in the various double heterozygous mutant lines that grew under 2i/L conditions. Note that the weak signal of tdTomato is due to the lack of polyA. Representative flow cytometry plots are shown out of three independent runs (n=3).

Figure S2

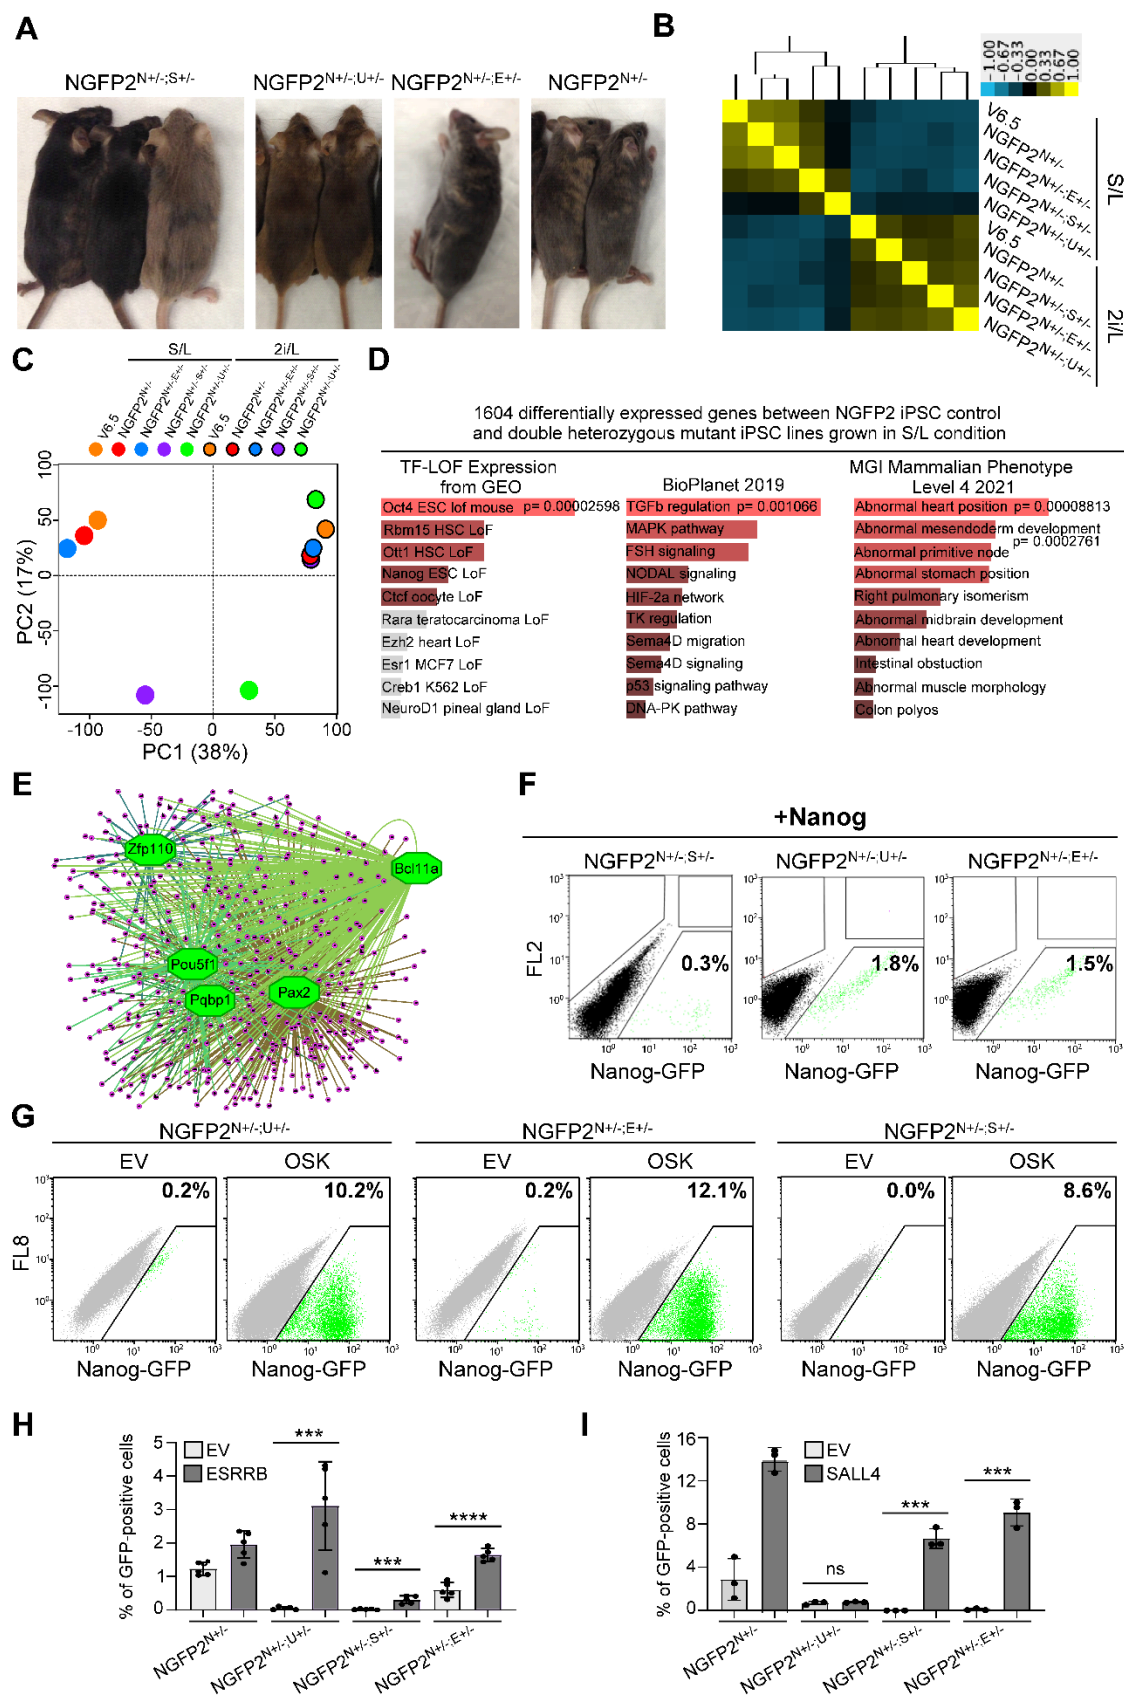

**Figure S2. The developmental potential and transcriptional profile of NGFP2<sup>N+/-</sup> double heterozygous mutant lines and rescue reprogramming experiments, related to main Figure 2.** (A) Representative images of adult chimeric mice produced by the various NGFP2<sup>N+/-</sup> double heterozygous mutant iPSC lines and control following blastocyst injection and transplantation into foster mothers. For each line, 30 injected blastocysts were transferred into pseudopregnant females and born mice were analyzed. Representative images show adult chimeric mice for each line and the grade of chimerism. (B) Pearson Correlation heatmap and dendrogram of global gene expression profiles for two RNA-seq replicates (n=2) for the indicated NGFP2<sup>N+/-</sup> iPSC lines and ESC (V6.5) control grown under S/L or 2i/L conditions. Replicate pairs are assigned a shared numerical value. (C) Principle component analysis for the indicated samples using 500 most differentially expressed genes among all samples. Two replicates are analyzed for each sample (n=2). PC1, 38%; PC2, 17%. Each line is marked by a specific color. The group names correspond to the names in (B). Cells that were grown in 2i/L are surrounded with black circle. (D) Bar graphs show the most enriched GO terms and their p-value, for 1604 genes that demonstrated differential expression between ESC (V6.5)/iPSC (NGFP2<sup>N+/-</sup>) control cells and all double heterozygous mutant iPSC lines, under S/L condition (Table S1), using EnrichR. p-value was calculated using Fisher exact test. (E) Gene regulatory network of the 1604 genes from (Table S1) constructed by iRegulon plugin tool in Cytoscape. Transcription factor (FDR < 0.001), Network Enrichment Score (NES) > 3. Green represents key regulators and pink marks regulated genes. Genes with no association were removed from the graph. (F, G) Flow cytometry analysis of Nanog-GFP-positive cells for the various NGFP2<sup>N+/-</sup> double heterozygous mutant induced cells following overexpression of *Nanog* (F) or OSK (G). Reprogramming occurred for 13 days with dox, followed by a 3-day dox removal. OSK indicates *Oct4*, *Sox2* and *Klf4* and EV indicates empty vector. Representative flow cytometry plots are shown out of 3 independent reprogramming runs (n=3). (H) Graph shows the percentage of Nanog-GFP-positive cells in the induced cells after 13 days of dox induction and 3 days of dox removal, expressing either empty vector (EV) control or ESRRB. Error bars indicate standard deviation between 5 independent experiments/replicates (n=5). \*\*\*\*p-value< 0.0001, \*\*\*p-value= 0.0009 for *Utf1*<sup>+/-</sup>, and 0.0006 for *Sall4*<sup>+/-</sup> using 2-tailed unpaired t test calculated by GraphPad Prism (8.3.0). (I) Graph shows Nanog-GFP-positive cell percentages in the indicated induced cells after 13 days of dox induction and 3 days of dox removal, expressing either empty vector (EV) control or SALL4. Error bars indicate standard deviation between 3 independent experiments/replicates (n=3). \*\*\*p-value= 0.0002 for *Sall4*<sup>+/-</sup>, and 0.0002 for *Esrrb*<sup>+/-</sup> using 2-tailed unpaired t test calculated by GraphPad Prism (8.3.0).

Figure S3

Differentially-expressed genes between control cells and all double heterozygous mutant lines at day 6 of reprogramming

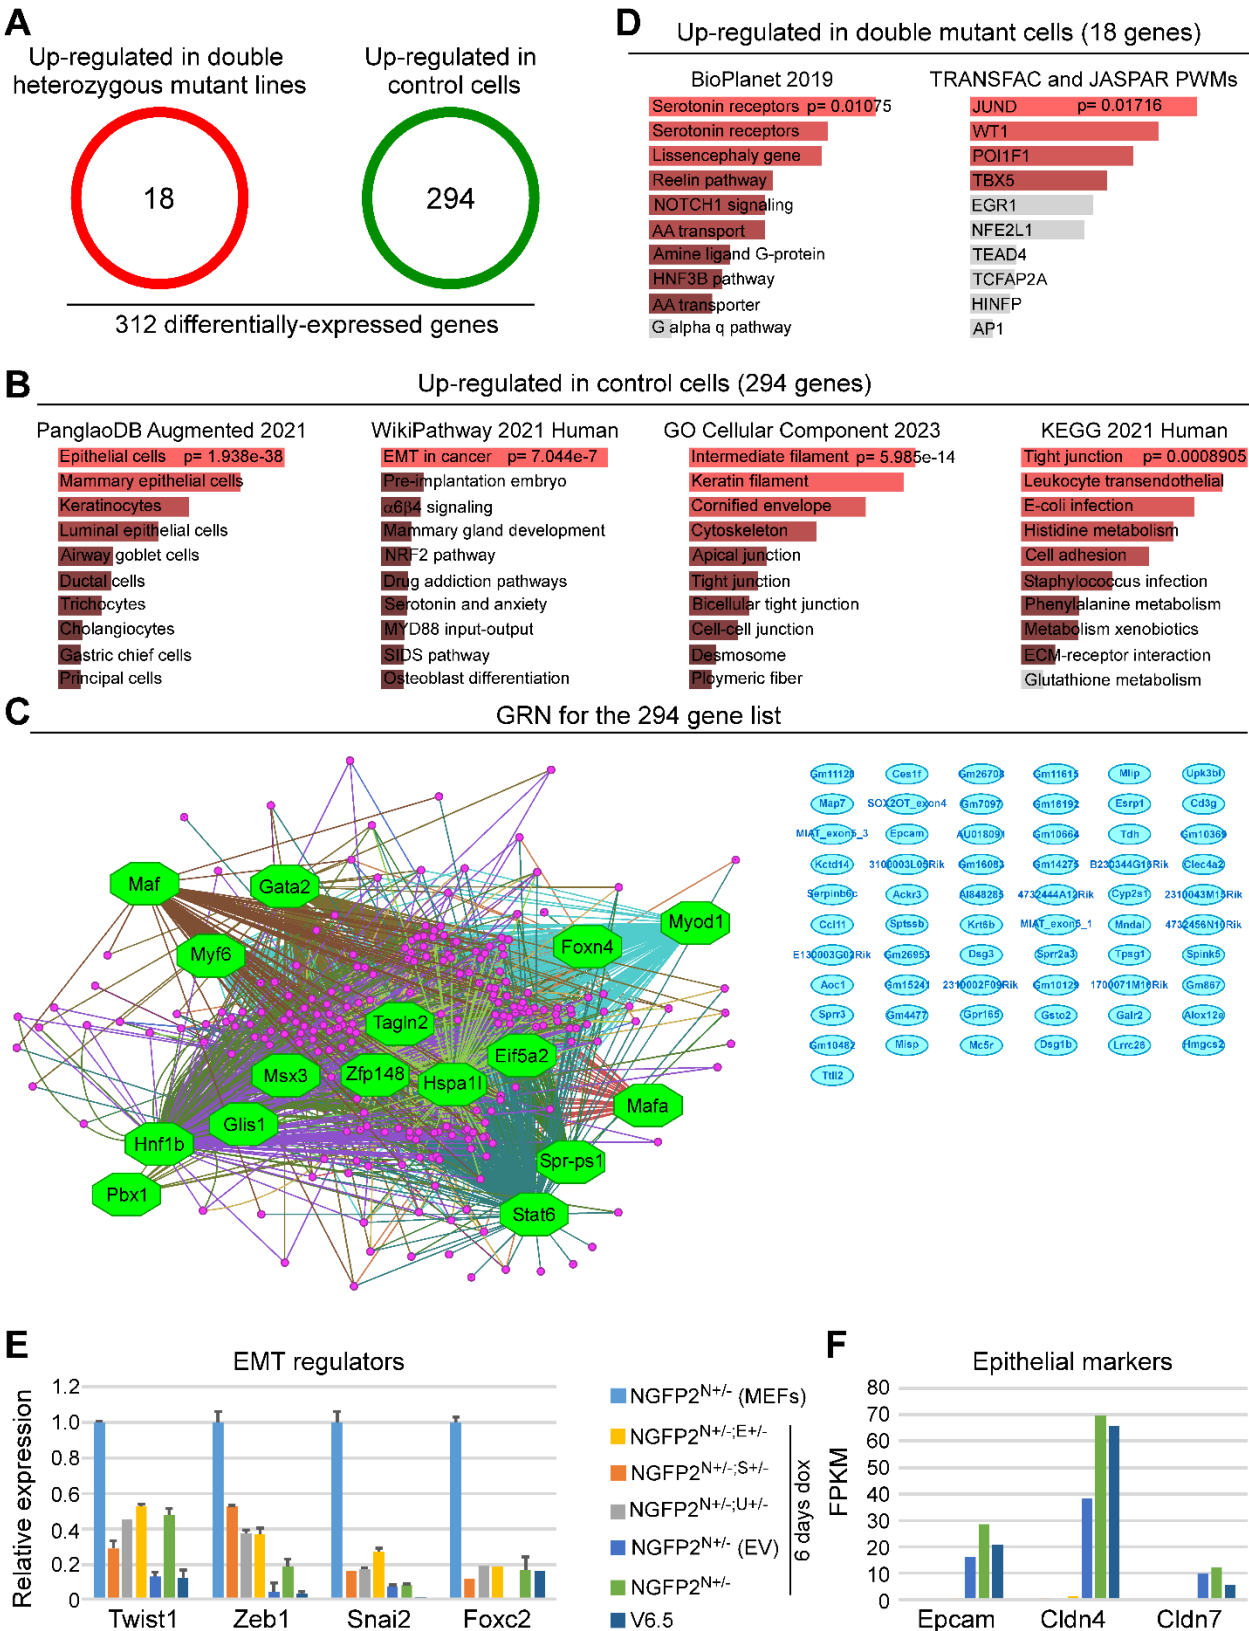

**Figure S3. NGFP2<sup>N+/-</sup> double heterozygous mutant lines fail to activate the epithelial program during reprogramming, related to main Figure 3. (A)** Schematic illustration of RNA-seq analysis depicting 18 upregulated genes in NGFP2 double heterozygous mutant lines and 294 upregulated genes in NGFP2<sup>N+/-</sup> control cells out of 312 differentially expressed genes (p-value < 0.05). **(B)** Bar graphs display the most enriched GO terms and their corresponding p-values for the 294 genes from (A) using EnrichR. The p-values were calculated using Fisher's exact test. **(C)** Gene regulatory network of the 294 genes from (A) constructed by iRegulon plugin tool in Cytoscape. Transcription factor (FDR < 0.001), Network Enrichment Score (NES) > 3. Green represents key regulators, pink marks regulated genes and turquoise depicts genes with no association. **(D)** Bar graphs display the most enriched GO terms and their p-value, for the 18 genes from (A) using EnrichR. p-values were calculated using Fisher exact test. **(E)** qPCR of the indicated EMT genes normalized to housekeeping control gene *Gapdh* in the various NGFP2<sup>N+/-</sup> double heterozygous mutant induced cells following 6 days of dox and in ESCs (V6.5) and NGFP2<sup>N+/-</sup> MEF control. Error bars presented as a mean ± SD of 2 duplicate runs (n=2) from a typical experiment out of 3 independent experiments (n=3). **(F)** Graph summarizes the expression level (FPKM- Fragments Per Kilobase Million) of the indicated epithelial genes in the various NGFP2<sup>N+/-</sup> double heterozygous mutant induced cells after 6 days of dox and in ESCs (V6.5) and NGFP2<sup>N+/-</sup> MEF control. Expression level of the depicted genes was obtained from the RNA-seq data described in Figure 3.

Figure S4

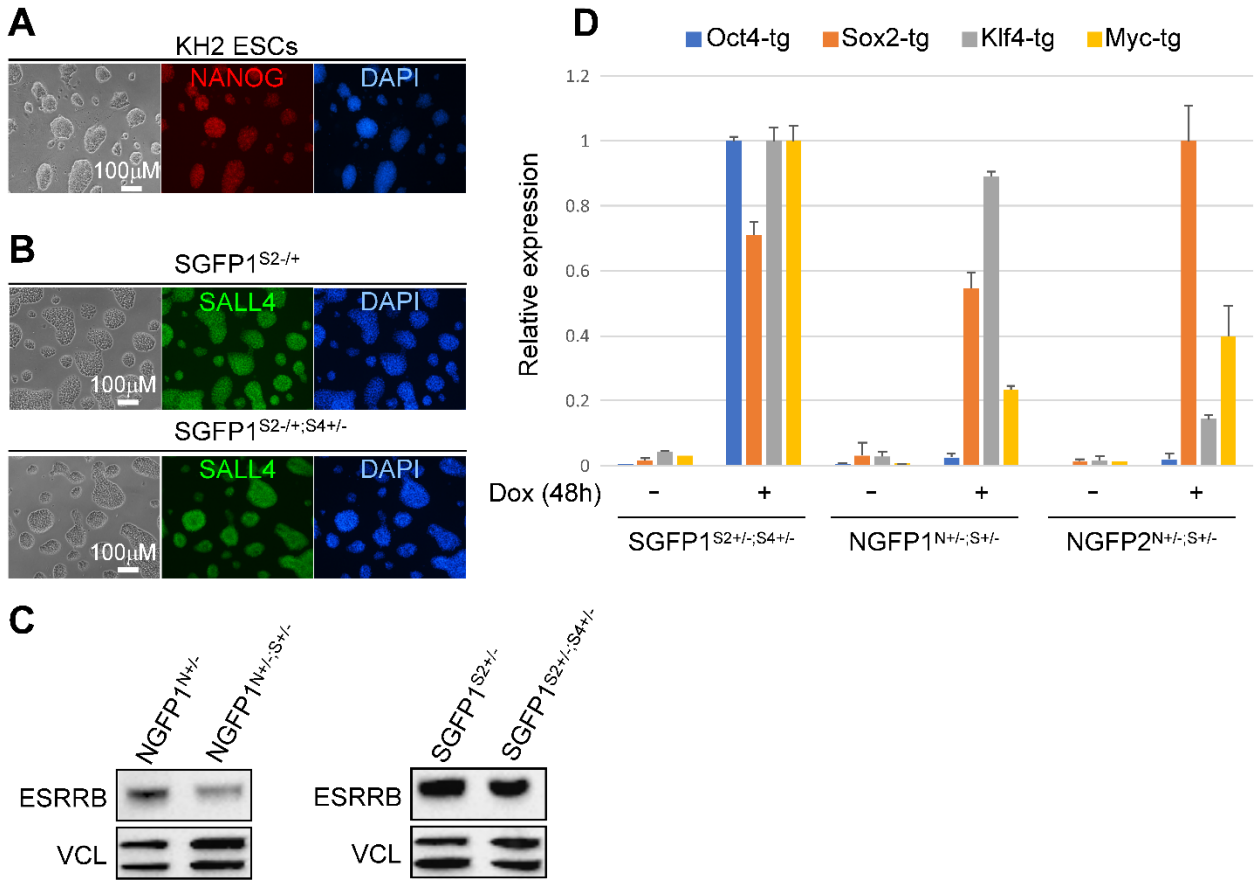

**Figure S4. NANOG, SALL4 and ESRRB protein level in targeted iPSC lines and controls, related to main**

**Figure 4. (A)** Bright field and immunostaining images for NANOG (red) and DAPI (blue) in KH2 ESCs. **(B)** Bright field and immunostaining images for SALL4 (green) and DAPI (blue) in SGFP1<sup>S2+/-</sup> and SGFP1<sup>S2+/-; S4+/-</sup> iPSC lines. **(C)** Western blot analysis of the protein levels of ESRRB in NGFP1<sup>N+/-; S+/-</sup> and SGFP1<sup>S2+/-; S4+/-</sup> double heterozygous mutant iPSC lines and in their parental control cells. Cells were grown in 2i/L condition to facilitate expression from both alleles. Vinculin (VCL) was used for loading control. **(D)** qPCR of the indicated OSKM transgenes normalized to housekeeping control gene *Gapdh* in the various double heterozygous mutant MEF lines following 2 days of culture with or without dox. Error bars presented as a mean  $\pm$  SD of 2 duplicate runs from a typical experiment out of three independent experiments (n=3).

Figure S5

RL8 ESCs: *Sall4*<sup>2A-EGFP-2A-ERT-CRE-ERT</sup>;*Rosa26*<sup>M2rtTA</sup>;tdTomato-LSL

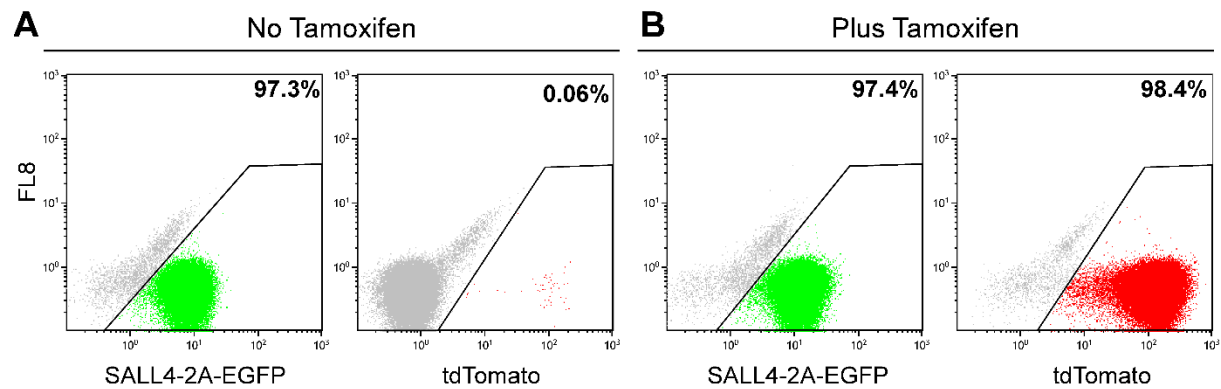

RL9 ESCs: *Nanog*<sup>2A-EGFP-2A-ERT-CRE-ERT</sup>;*Rosa26*<sup>M2rtTA</sup>;tdTomato-LSL

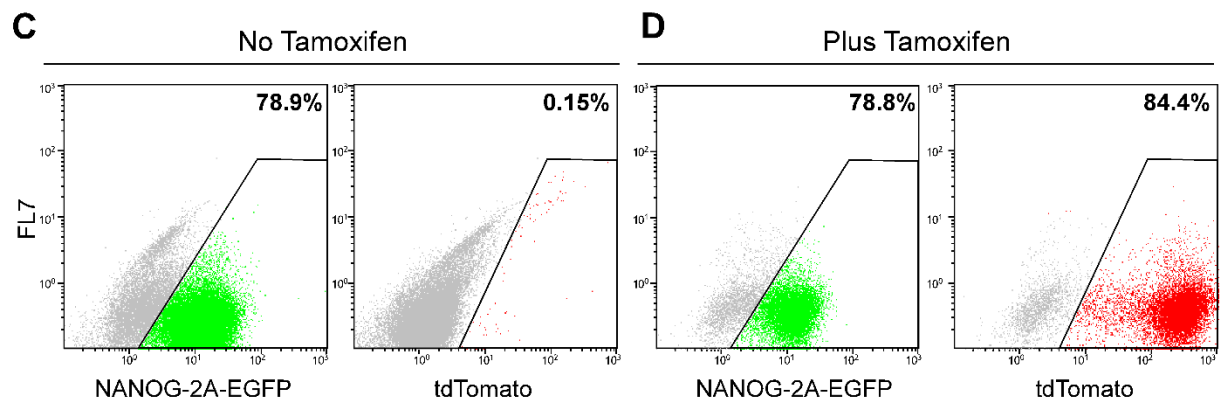

**E** Nanog tracing system  
25,000 tdTomato-positive cells were sorted at day 6

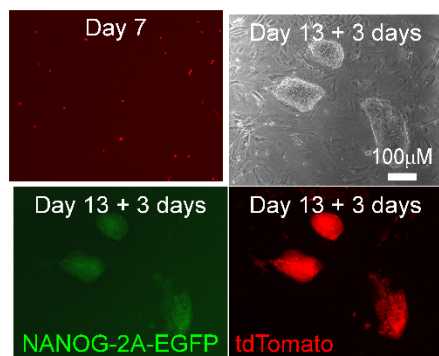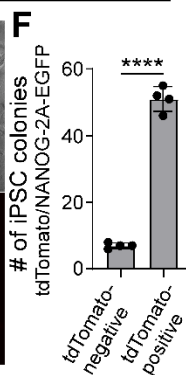

**G** Sall4 tracing system  
10,000 tdTomato-positive cells were sorted at day 6

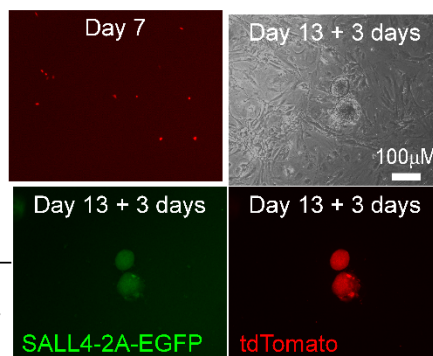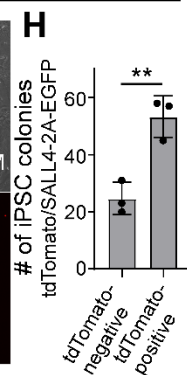

**Figure S5. Sall4 and Nanog tracing system characterization, related to main Figure 5. (A, B)** Flow cytometry analysis for SALL4-2A-EGFP and tdTomato in the targeted ESC clone RL8 before (A) and after tamoxifen addition (B) (48 hours). Representative flow cytometry plots are out of three independent runs (n=3). **(C, D)** Flow cytometry analysis for NANOG-2A-EGFP and tdTomato in the targeted ESC clone RL9 before (C) and after tamoxifen addition (D) (48 hours). Representative flow cytometry plots are shown out of three independent runs (n=3). **(E-H)** MEFs derived from Nanog (E, F) or Sall4 (G, H) tracing system were infected with dox-inducible OSKM lentiviral vectors and reprogrammed in the presence of dox and tamoxifen for 13 days, followed by 3 days of dox removal. On day 6 of reprogramming, tdTomato-positive cells (25,000 cells for Nanog tracing system and 10,000 cells for Sall4 tracing system) were sorted and seeded on feeder-coated wells for continuous reprogramming. **(E, left upper panel)** Representative RFP channel image displays single tdTomato-positive cells from the Nanog tracing system, taken one day after sorting (Day 7). **(E, right and lower panels)** Representative bright field, RFP and green channel images of stable iPSC colonies from tdTomato-positive cells at the end of the reprogramming process. **(F)** Graph summarizes the number of tdTomato/EGFP-positive iPSC colonies generated from tdTomato-negative and tdTomato-positive sorted cells using the *Nanog* tracing system. Error bars indicate standard deviation between 4 independent experiments/replicates (n=4). \*\*\*\*p-value< 0.0001 using 2-tailed unpaired t test calculated by GraphPad Prism (8.3.0). **(G, left upper panel)** Representative RFP channel image shows single tdTomato-positive cells from Sall4 tracing system one day after sorting (Day 7). **(G, right and lower panels)** Representative bright field, RFP and green channel images of stable iPSC colonies from tdTomato-positives cells at the end of the reprogramming process. **(H)** Graph summarizes the number of tdTomato/EGFP-positive iPSC colonies generated from tdTomato-negative and tdTomato-positive sorted cells using the Sall4 tracing system. Error bars indicate standard deviation between 3 independent experiments/replicates (n=3). \*\*p-value= 0.0057 using 2-tailed unpaired t test calculated by GraphPad Prism (8.3.0).

Figure S6

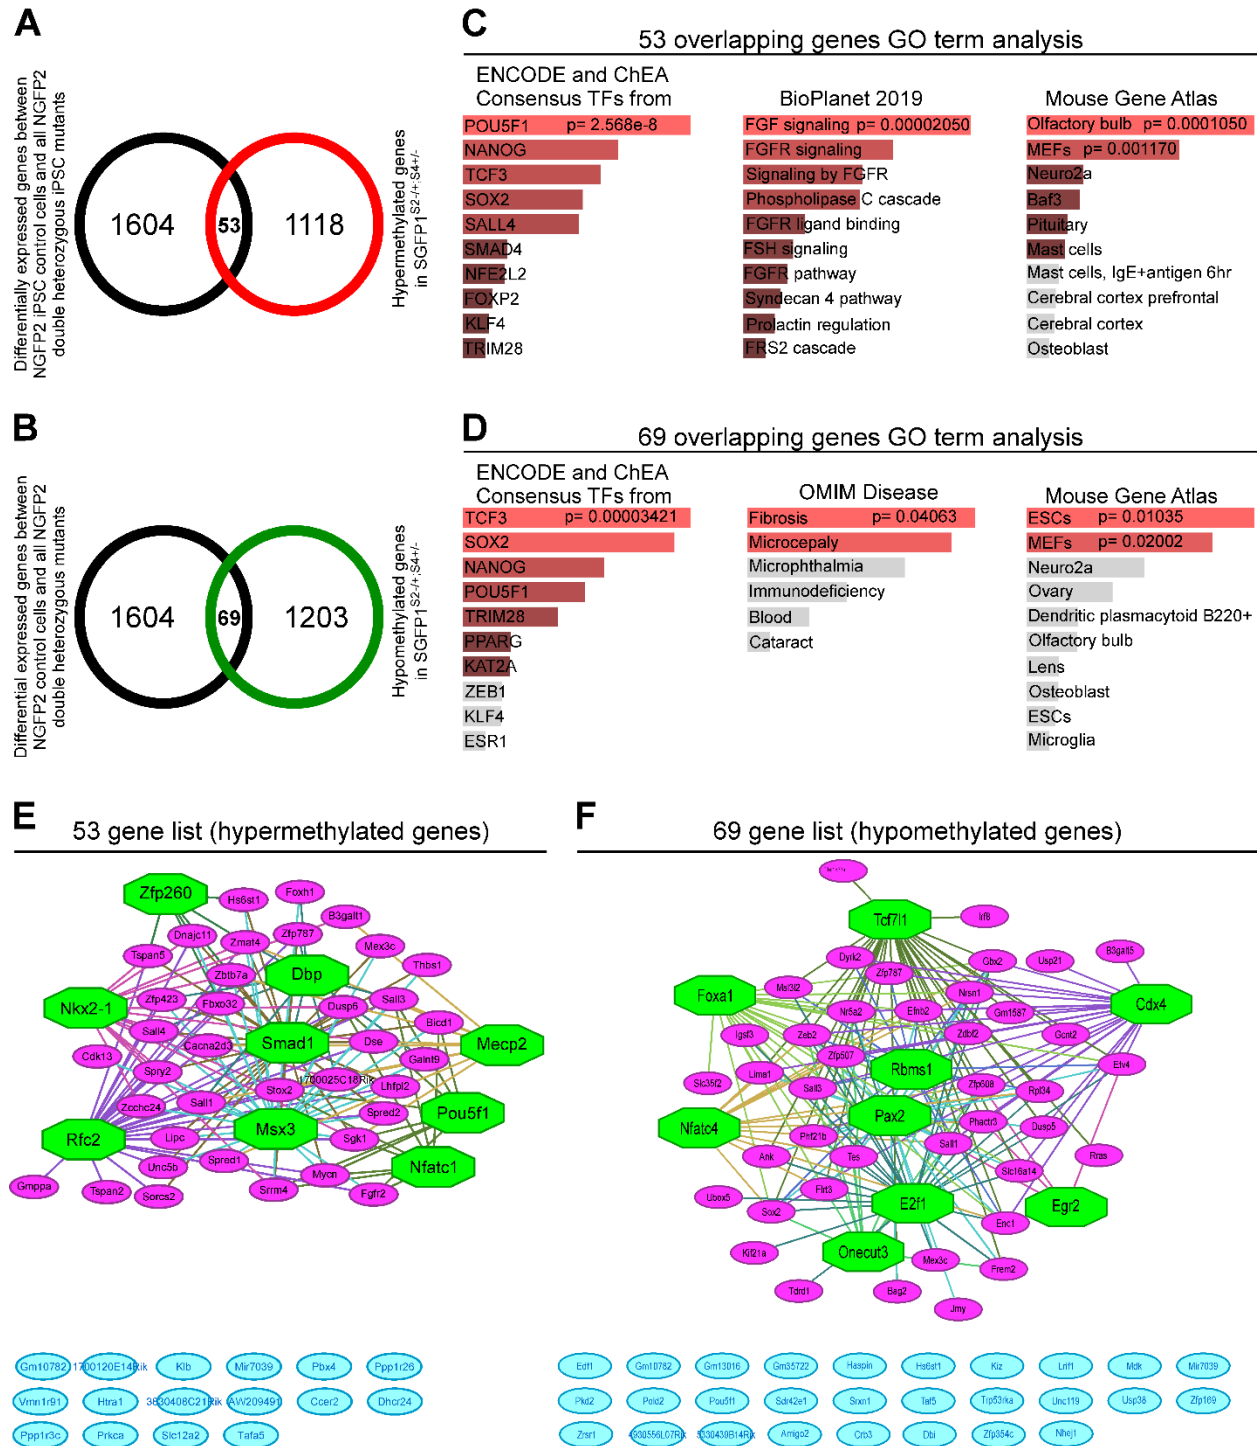

**Figure S6. The specific transcriptome of NGFP2<sup>N+/-</sup> double heterozygous mutant iPSCs exhibit similarities to SGFP1<sup>S2+/-</sup> double heterozygous MEF methylation profile, related to main Figure 6. (A)** Venn diagram displays the 53 overlapping genes (p-value< 0.00001, Fisher exact test) between the 1604 differentially expressed genes in NGFP2<sup>N+/-</sup> iPSC control versus all NGFP2 double heterozygous mutant iPSC lines and the 1118 hypermethylated genes in SGFP1<sup>S2+/-;S4+/-</sup> MEFs versus SGFP1<sup>S2+/-</sup> control MEFs. **(B)** Venn diagram shows the 69 overlapping genes (p-value< 0.00001, Fisher exact test) between the 1604 differentially expressed genes in NGFP2<sup>N+/-</sup> iPSC control versus all NGFP2 double heterozygous mutant iPSC lines and the 1203 hypomethylated genes in SGFP1<sup>S2+/-;S4+/-</sup> MEFs versus SGFP1<sup>S2+/-</sup> control MEFs. **(C, D)** Bar graphs display the most enriched GO terms and their p-value, for the 53 or 69 genes from (A) and (B), respectively using EnrichR. p-values were calculated using Fisher exact test. **(E,F)** Gene regulatory network of the 53 overlapping genes (E) or 69 overlapping genes (F) from (A) and (B), respectively constructed by iRegulon plugin tool in Cytoscape. Transcription factor (FDR < 0.001), Network Enrichment Score (NES) > 3. Green represents key regulators, pink marks regulated genes and turquoise depicts genes with no association.

## EXPERIMENTAL PROCEDURES

### Cell culture

Mouse embryonic fibroblasts (MEFs) were isolated as previously described (Wernig et al., 2008). MEFs were grown in DMEM supplemented with 10% fetal bovine serum, 1% non-essential amino acids, 2 mM L-Glutamine and antibiotics. ESCs and iPSCs were grown in S/L medium or 2i/L: DMEM supplemented with 10% fetal bovine serum, 1% non-essential amino acids, 2 mM L-Glutamine, 2X10<sup>6</sup> units mLif, 0.1 mM  $\beta$ -mercaptoethanol (Sigma) and antibiotics with or without 2i- PD0325901 (1 mM) and CHIR99021 (3 mM) (PeproTech). All the cells were maintained in a humidified incubator at 37°C and 6% CO<sub>2</sub>. All infections were performed on MEFs (passage 0-2) that were seeded at 50-70% confluency two days before the first infection. During the reprogramming to iPSC, the cells were grown in S/L medium with the addition of 2  $\mu$ g/ml doxycycline.

### Secondary MEF production

Briefly, iPSC lines (NGFP2, NGFP1 and SGFP1 lines) were injected into blastocysts and chimeric embryos were isolated at E13.5. For MEF production, embryos were dissected under the binocular removing internal organs and heads. The remaining body was chopped thoroughly by scalpels and exposed to 1ml Trypsin-EDTA (0.25%, GIBCO) for 30 minutes at 37°C. Following that, 10 mL of DMEM medium containing 10%FBS was added to the plate and the chopped tissue was subjected to thorough and intensive pipetting resulting in a relatively homogeneous mix of cells. Each chopped embryo was seeded in 15cm plate and cells were cultured in DMEM supplemented with 10%FBS, 2mM L-glutamine, and antibiotics until the plate was full. Puromycin (2  $\mu$ g/ml) was added to each 15cm plate for positive selection for NGFP2, NGFP1 and SGFP1 MEFs, eliminating only the host cells.

### Immunostaining and Western blot

Cells were fixed in 4% paraformaldehyde (in PBS) for 20 minutes. The cells were rinsed 3 times with PBS and blocked for 1hr with PBS containing 0.1% Triton X-100 and 5% FBS. The cells were incubated overnight with primary antibodies (1:200) in 4°C. The antibodies are: anti-SALL4 (Abcam, ab29112, 1:500) and anti-NANOG (Bethyl, A300-379A, 1:500) in PBS containing 0.1% Triton X-100 and 1%FBS. The next day, the cells were washed 3 times and incubated for 1hr with relevant (Alexa, 1:500) secondary antibody in PBS containing 0.1% Triton X-100 and 1% FBS. DAPI (1:1000 dilution) was added 10 minutes before the end of incubation. For western blot, cell pellets were lysed on ice in lysis buffer (20 mM Tris-HCl, pH 8, 1mM EDTA pH 8, 0.5% Nonidet P-40, 150mM NaCl, 10% glycerol, 1mM, protease inhibitors (Roche Diagnostics)

for 10 min, supernatant were collected and 40µg protein were suspended with sample buffer and boiled for or 5 min at 100C, and subjected to western blot analysis. Primary antibodies: anti-SALL4 (Abcam, ab29112, 1:500), anti-NANOG (Bethyl, A300-379A, 1:500), anti-ESRRB (Perseus proteomics, PP-H6705-00, 1:500), anti-UTF1 (Abcam, ab24273, 1:500), anti-ACTB (Santa cruz, sc-1616, 1:500), anti-β-TUBULIN (Abcam, ab179513, 1:500), anti-VCT (Abcam, ab129002, 1:500). Blots were probed with anti-mouse, anti-goat or anti-rabbit IgG-HRP secondary antibody (1:10,000) and visualized using ECL detection kit.

#### Quantitative real-time PCR

Total RNA was isolated using the Macherey-Nagel kit (Ornat). 500–2000 ng of total RNA was reverse transcribed using iScript cDNA Synthesis kit (Bio-Rad). Quantitative PCR analysis was performed in duplicates using 1/100 of the reverse transcription reaction in a StepOnePlus (Applied Biosystems) with SYBR green Fast qPCR Mix (Applied Biosystems). Specific primers flanking an intron were designed for the different genes (see Primer Table S2). All quantitative real-time PCR experiments were repeated at least three times, and the results were normalized to the expression of *Gapdh* and presented as a mean ± standard deviation of two duplicate runs from a typical experiment.

#### Southern Blot

Southern blot was performed as previously described (Carey et al., 2011). For primer list see Table S2.

#### FACS analysis

Cells were washed twice with PBS and trypsinized (0.25%) and filtered through mesh paper. Flow cytometry analysis was performed on a Beckman Coulter and analyzed using Kaluza Software. All FACS experiments were repeated at least three times, and the bar graph results are presented as a mean ± standard deviation of two biological duplicate from a typical experiment. Flow cytometry analysis was performed on a Beckman Coulter and analyzed using Kaluza Software.

#### RNA sequencing

Total RNA was isolated using Rneasy Kit (QIAGEN) and sent to the “Technion Genome Center”, Israel, for library preparation and sequencing.

### Cleaning and filtering of raw reads

Raw reads (fastq files) were inspected for quality issues with FastQC (v0.11.2, <http://www.bioinformatics.babraham.ac.uk/projects/fastqc/>). According to the FastQC report, reads were then trimmed to a length of 50 bases with fastx\_trimmer of the FASTX package (version 0.0.13, [http://hannonlab.cshl.edu/fastx\\_toolkit/](http://hannonlab.cshl.edu/fastx_toolkit/)), and quality-trimmed at both ends, using in-house perl scripts, with a quality threshold of 32. In short, the scripts use a sliding window of 5 base pairs from the read's end and trim one base at a time until the average quality of the window passes the given threshold. Following quality-trimming, adapter sequences were removed by Trim Galore (version 0.3.7, [http://www.bioinformatics.babraham.ac.uk/projects/trim\\_galore/](http://www.bioinformatics.babraham.ac.uk/projects/trim_galore/)), using the command “trim\_galore -a \$adseq -length 15” where \$adseq is the appropriate adapter sequence. The remaining reads were further filtered to remove very low-quality reads, using the fastq\_quality\_filter program of the FASTX package, with a quality threshold of 20 at 90 percent or more of the read's positions.

### Expression analysis

The cleaned fastq files were mapped to the mouse transcriptome and genome, Ensembl version GRCm38 from Illumina's iGenomes ([http://support.illumina.com/sequencing/sequencing\\_software/igenome.html](http://support.illumina.com/sequencing/sequencing_software/igenome.html)), using TopHat (v2.0.11), allowing up to 3 mismatches and a total edit distance of 8 (full command: tophat -G Mus\_musculus/Ensembl/GRCm38/Annotation/Genes/genes.gtf -N 3 --read-gap-length 5 --read-edit-dist 8 --segment-length 18 --read-realign-edit-dist 5 --b2-i S,1,0.75 --b2-mp 3,1 --b2-score-min L,-0.5,-0.5 Mus\_musculus/Ensembl/GRCm38/Sequence/Bowtie2Index/genome\_clean.fastq). Quantification and normalization were done with the Cufflinks package (v2.2.1). Quantification was done with cuffquant, using the genome bias correction (-b parameter), multi-mapped reads assignment algorithm (-u parameter) and masking for genes of type IG, TR, pseudo, rRNA, tRNA, miRNA, snRNA and snoRNA (-M parameter). Normalization was done with cuffnorm (using output format of Cuffdiff).

### Visualization

The R package cummeRbund (version 2.8.2) was used to calculate and draw the figures (such as scatter plots, MA plots, etc.) from the normalized expression values.

### Chimera Formation

Blastocyst injections were performed using (C57/Bl6xDBA) B6D2F2 or CB6F1 host embryos. All injected iPSC lines were derived from crosses of 129Sv/Jae to C57/Bl6 mice and could be identified by agouti coat color. Embryos were obtained 24 hr (1 cell stage) or 40 hr (2 cell stage) posthuman chorionic gonadotropin (hCG) hormone priming. Diploid embryos were cultured in EmbryoMax KSOM (Millipore) or Evolve KSOMaa (Zenith Biotech) until they formed blastocysts (94–98 hr after hCG injection) at which point they were placed in a drop of Evolve w/HEPES KSOMaa (Zenith) medium under mineral oil. A flat tip microinjection pipette with an internal diameter of 16  $\mu$ m (Origio) was used for iPSC injections. Each blastocyst received 8–12 iPSCs. Shortly after injection, blastocysts were transferred to day 2.5 recipient CD1 females (20 blastocysts per female). Pups, when not born naturally, were recovered at day 19.5 by cesarean section and fostered to lactating Balb/c mothers.

### Nuclear transfer

Nuclear transfer was performed as described (Wakayama et al., 1998) with modifications. Briefly, metaphase II-arrested oocytes were collected from superovulated B6D2F1 females (8-10 wks) and cumulus cells were removed using hyaluronidase. The oocytes were enucleated in a droplet of HEPES-CZB medium containing 5 $\mu$ g/ml cytochalasin B (CB) using a blunt Piezo-driven pipette. After enucleation, the spindle-free oocytes were washed extensively and maintained in CZB medium up to 2 h before nucleus injection. The CCs from mice (B6D2F1) were aspirated in and out of the injection pipette to remove the cytoplasmic material and then injected into enucleated oocytes. The reconstructed oocytes were cultured in CZB medium for 1 h and then activated for 5-6 h in activation medium containing 10mM Sr 2+, 5ng/ml trichostatin A (TSA) and 5 $\mu$ g/ml CB. Following activation, all of the reconstructed embryos were cultured in KSOM medium supplemented with 5ng/ml TSA for another 3-4 hours and maintained in KSOM medium with amino acids at 37C under 5% CO<sub>2</sub> in air.

### Reduced-representation bisulfite sequencing (RRBS)

DNA was isolated from MEFs and incubated in lysis buffer (25 mM Tris-HCl (pH 8), 2 mM ethylenediaminetetraacetic acid, 0.2% sodium dodecyl sulfate, 200 mM NaCl) supplemented with 300  $\mu$ g/mL proteinase K (Roche) followed by phenol:chloroform extraction and ethanol precipitation and RRBS libraries were prepared (Boyle et al., 2012) and run on HiSeq 2500 (Illumina) using 100 bp paired-end sequencing.

DNA methylation was analyzed by using 100 bp paired-end sequencing reads from RRBS that were trimmed and quality filtered by trim galore software using default parameters for RRBS. Read alignment (genome build mm10) and extraction of single-base resolution methylation levels were carried out by BSMAP. Differentially methylated regions (DMR) were explored with R methylKit package version 1.18.0 (Akalin et al., 2012). CpG sites featuring less than 10 reads were considered unreliable and discarded from further analysis. CpG sites were then aggregated into consecutive tiles of size 100 bp and a threshold of at least 15 reads per tile was applied. Differential methylation between the two lines, each consisting of three samples, was determined by logistic regression and adjusted p-values are calculated with SLIM (sliding linear model). A threshold of 1E-3 was set for adjusted p-value and a threshold of 20 methylation points was set between the two lines and further explored. DMRs were annotated with Homer (Hypergeometric Optimization of Motif Enrichment) version 4.11.1 (Heinz et al., 2010) and specifically its function annotatePeaks.pl. This function outputs a set of genes affiliated with DMR based on the nearest promoter distance. Heatmaps were created with R package heatmap.2 version 3.1.1 and dendrogram with R package dendextend version 1.15.2 (Galili, 2015).

#### Figure legends and tables

**Table S1. Differential expressed genes and genomic loci between control and double heterozygous mutant lines, related to main Figures 3, 6, and Supplementary Figures S2, S3, S6.**

**Table S2. primer list used in this study, related to main Figures 3, 4, 5, and Supplementary Figures S1, S3, S4.**

| Gene   | Application                                    | Primer Sequence (5' --> 3')                                 |
|--------|------------------------------------------------|-------------------------------------------------------------|
| Gapdh  | qPCR analysis of mRNA expression normalization | F: CCTCAACGACCACTTTGTCAAG<br>R: TCTTCCTCTTGTGCTCTTGCTG      |
| Thy1   | qPCR analysis of mRNA expression               | F: CCAGAACGTCACAGTGCTCA<br>R: AGGTGTTCTGAGCCAGCAG           |
| Col5a2 | qPCR analysis of mRNA expression               | F: TAGAGGAAGAAAGGGACAAAAAGG<br>R: GTTACAACAGGCACTAATCCTGGTT |
| Postn  | qPCR analysis of mRNA expression               | F: ACAACAATCTGGGGCTTTTT<br>R: AATCTGGTTCCCATGGATGA          |
| Des    | qPCR analysis of mRNA expression               | F: TGGAGCGTGACAACCTGATA<br>R: AAGGCAGCCAAGTTGTTCTC          |
| Cdh1   | qPCR analysis of mRNA expression               | F: CTCGACACCCGATTCAAAGT<br>R: GGCGTAGACCAAGAAATGGA          |

|                     |                                             |                                                                       |
|---------------------|---------------------------------------------|-----------------------------------------------------------------------|
| Dsp                 | qPCR analysis of mRNA expression            | F: ACCGTCAACGACCAGAACTC<br>R: TTTGCAGCATTTCTTGATG                     |
| Nanog               | qPCR analysis of mRNA expression            | F: AAACCAGTGGTTGAAGACTAGCAA<br>R: GGTGCTGAGCCCTTCTGAATC               |
| Oct4 endogenous     | qPCR analysis of mRNA expression            | F: TCAGTGATGCTGTTGATCAGG<br>R: GCTATCTACTGTGTGTCCAGTC                 |
| Sox2 endogenous     | qPCR analysis of mRNA expression            | F: CCGTTTTCTGGTCTTGT<br>R: TCAACCTGCATGGACATTTT                       |
| Lin28               | qPCR analysis of mRNA expression            | F: GAAGAACATGCAGAAGCGAAGA<br>R: CCGCAGTTGTAGCACCTGTCT                 |
| Fbxo15              | qPCR analysis of mRNA expression            | F: CGAGAATGGTGGACTAGCTTTTG<br>R: GGCCATGGGAATGAATATTTG                |
| Fgf4                | qPCR analysis of mRNA expression            | F: GCAGACACGAGGGACAGTCT<br>R: ACTCCGAAGATGCTCACCAC                    |
| Sall4               | qPCR analysis of mRNA expression            | F: GCAAGTCACCAGGGCTCTT<br>R: CCTCCTTAGCTGACAGCAATC                    |
| Utf1                | qPCR analysis of mRNA expression            | F: GTCCCTCTCCGCGTTAGC<br>R: GGCAGGTTCGTCATTTTCC                       |
| Esrrb               | qPCR analysis of mRNA expression            | F: CACCTGCTAAAAAGCCATTGACT<br>R: CAACCCCTAGTAGATTCGAGACGAT            |
| Dppa3               | qPCR analysis of mRNA expression            | F: TCGGATTGAGCAGAGACAAAAA<br>R: TCCCGTTCAAACCTATTTCTT                 |
| Twist1              | qPCR analysis of mRNA expression            | F: ACGCTGCCCTCGGACAA<br>R: CCTGGCCGCCAGTTTG                           |
| Zeb1                | qPCR analysis of mRNA expression            | F: CCAGGTGTAAGCGCAGAAAG<br>R: TCATCGGAATCTGAATTTGCT                   |
| Snai2               | qPCR analysis of mRNA expression            | F: ATCCTCACCTCGGGAGCATA<br>R: TGCCGACGATGTCCATACAG                    |
| Foxc2               | qPCR analysis of mRNA expression            | F: AGAACAGCATCCGCCACAAC<br>R: GCACTTTCACGAAGCACTCATT                  |
| Oct4-transgene      | qPCR analysis of transgenic mRNA expression | F : CGCCTGGAGACGCCATCCACGCT<br>R: GTTGGTTCCACCTTCTCCAA                |
| Sox2-transgene      | qPCR analysis of transgenic mRNA expression | F: GCCCAGTAGACTGCACATGG<br>R: AGAATACCAGTCAATCTTTCA                   |
| Klf4-transgene      | qPCR analysis of transgenic mRNA expression | F: CGCCTGGAGACGCCATCCACGCT<br>R: ACGCAGTGTCTTCTCCCTTC                 |
| Myc-transgene       | qPCR analysis of transgenic mRNA expression | F : TGTCCATTCAAGCAGACGAG<br>R: AGAATACCAGTCAATCTTTCA                  |
| Nanog gRNA          | gRNA for generating Nanog KO iPSCs          | F: CACCGAGAACTATTCTTGCTTACA<br>R: AAACGTGAAGCAAGAATAGTTCTC            |
| Nanog KO            | KO validation PCR                           | F: CGGCTCACTTCCTTCTGACT<br>R: TATTGCTCCGTCCTGTGTCC                    |
| Nanog tracing 5 arm | PCR for generating arm for targeting vector | F : TAACAGCTGAAGTACCTCAGCCTCCAGCA<br>R:TAACAGCTGTATTTACCTGGTGGAGTCACA |
| Nanog tracing 3 arm | PCR for generating arm for targeting vector | F: GGTACCCAGCCCCTGGTTTATTTTT<br>R: CCGCGGACCCACACAGCCTCTCAAGT         |

|                                |                                                                     |                                                                                    |
|--------------------------------|---------------------------------------------------------------------|------------------------------------------------------------------------------------|
| Nanog gRNA                     | gRNA tracing                                                        | F: CACCGGATTTGAACTCCTGACCTT<br>R: AAACAAGGTCAGGAGTTCAAATCC                         |
| Nanog validation 5 arm tracing | PCR analysis of integration into genomic DNA                        | F: CCACCCCGTGAAGTACTGACT<br>R: CGTCACCGCATGTTAGAAGA                                |
| Nanog validation 3 arm tracing | PCR analysis of integration into genomic DNA                        | F : GGTACCCAGCCCCTGGTTTATTTTT<br>R : CCCTGTGAGTGGTCAGGAGT                          |
| Sall4 tracing 5 arm            | PCR for generating arm for targeting vector                         | F: GTTAACGCAAGGGAGAGCCAGTATT<br>R: GTTAACGCTGACAGCAATCTTATT                        |
| Sall4 tracing 3 arm            | PCR for generating arm for targeting vector                         | F: GGTACCCTGATATGCAAGTGATGT<br>R: CCGCGGATACACACAAGCCCGCCTC                        |
| Sall4 gRNA                     | gRNA tracing                                                        | F: CACCGGAGGAGAGGAGTCTTCTGC<br>R: AAACGCAGAAGACTCCTCTCCTCC                         |
| Sall4 validation 5 arm tracing | PCR analysis of integration into genomic DNA                        | F: TAATCCAGCCTTGCTCGTCT<br>R: CGTCACCGCATGTTAGAAGA                                 |
| Sall4 validation 3 arm tracing | PCR analysis of integration into genomic DNA                        | F: ACAGCTGTCGAGGTACCCTGA<br>R: GTGTGTGTGTGTCCGTCCTC                                |
| Nanog-cDNA                     | Primers used for cloning of cDNA for lentiviral gene overexpression | F: CGCCATCACACTGACATGA<br>R: TGGAAGAAGGAAGGAACCTG                                  |
| Sall4-cDNA                     | Primers used for cloning of cDNA for lentiviral gene overexpression | F: GCAAGTCACCAGGGCTCTT<br>R: CCTCCTTAGCTGACAGCAAT                                  |
| Esrrb-cDNA                     | Primers used for cloning of cDNA for lentiviral gene overexpression | F: GCTGGAACACCTGAGGGTAA<br>R: GGTCTCCACTTGGATCGTGT                                 |
| Utf1-cDNA                      | Primers used for cloning of cDNA for lentiviral gene overexpression | F: CTACCTGGCTCAGGGATGCT<br>R: GACTGGGAGTCGTTTCTGGA                                 |
| Sall4 gRNA                     | gRNA for generating Sall4 KI/KO in NGFP1 and SGFP1                  | F: CACCGCCAGCTCTCCGCGGATGGT<br>R: AAACACCATCCGCGGAGAGCTGGC                         |
| Sall4 5arm validation PCR      | PCR analysis of integration into genomic DNA                        | F: CATAACAAAGCCCCAGGTT<br>R: GCGCATGAACTCTTTGATGA                                  |
| Sall4 3arm validation PCR      | PCR analysis of integration into genomic DNA                        | F: CGGGATCCGAAGTTCCTATT<br>R: AGCTTGCAAAGGGAAAGACA                                 |
| Utf1 KI/KO targeting 5arm      | PCR for generating arm for targeting vector                         | F: GAACAGGCTTTTGGCTTCAG<br>R: GGCGCTGGGGACGTCCAGGG<br>Product size: 2920 bps       |
| Utf1 KI/KO targeting 3arm      | PCR for generating arm for targeting vector                         | F: GGCCATACCTTCGAATCCTC<br>R: CCAACACCCAAGAGAAGAGG<br>Product size: 1905 bps       |
| Esrrb KI/KO targeting 5arm     | PCR for generating arm for targeting vector                         | F: AGACACAAGGCTGGAGAGGA<br>R: GGTACCGTGGTAGCCAGAGGCAATG<br>Product size : 3050 bps |
| Esrrb KI/KO targeting 3arm     | PCR for generating arm for targeting vector                         | F: GGGACCTCAAGGTGAAATGA<br>R: TAAGCCCAACACCTGGAAAC<br>Product size: 3400 bps       |

|                            |                                             |                                                                              |
|----------------------------|---------------------------------------------|------------------------------------------------------------------------------|
| Sall4 KI/KO targeting 5arm | PCR for generating arm for targeting vector | F: CAGCCTGGGCTACTTGAGAC<br>R: CTCCTCCCAGTTGATGTGCT<br>Product size: 3200 bps |
| Sall4 KI/KO targeting 3arm | PCR for generating arm for targeting vector | F: TGGTCCACCTGGAACAAAAG<br>R: AGAAGGGAGCTATGGCACAA<br>Product size: 3155 bps |

## REFERENCES

- Akalin, A., Kormaksson, M., Li, S., Garrett-Bakelman, F.E., Figueroa, M.E., Melnick, A., and Mason, C.E. (2012). methylKit: a comprehensive R package for the analysis of genome-wide DNA methylation profiles. *Genome Biol* 13, R87.
- Boyle, P., Clement, K., Gu, H., Smith, Z.D., Ziller, M., Fostel, J.L., Holmes, L., Meldrim, J., Kelley, F., Gnirke, A., *et al.* (2012). Gel-free multiplexed reduced representation bisulfite sequencing for large-scale DNA methylation profiling. *Genome Biol* 13, R92.
- Carey, B.W., Markoulaki, S., Hanna, J.H., Faddah, D.A., Buganim, Y., Kim, J., Ganz, K., Steine, E.J., Cassady, J.P., Creighton, M.P., *et al.* (2011). Reprogramming factor stoichiometry influences the epigenetic state and biological properties of induced pluripotent stem cells. *Cell stem cell* 9, 588-598.
- Galili, T. (2015). dendextend: an R package for visualizing, adjusting and comparing trees of hierarchical clustering. *Bioinformatics* 31, 3718-3720.
- Heinz, S., Benner, C., Spann, N., Bertolino, E., Lin, Y.C., Laslo, P., Cheng, J.X., Murre, C., Singh, H., and Glass, C.K. (2010). Simple combinations of lineage-determining transcription factors prime cis-regulatory elements required for macrophage and B cell identities. *Mol Cell* 38, 576-589.
- Wakayama, T., Perry, A.C., Zuccotti, M., Johnson, K.R., and Yanagimachi, R. (1998). Full-term development of mice from enucleated oocytes injected with cumulus cell nuclei. *Nature* 394, 369-374.
- Wernig, M., Lengner, C.J., Hanna, J., Lodato, M.A., Steine, E., Foreman, R., Staerk, J., Markoulaki, S., and Jaenisch, R. (2008). A drug-inducible transgenic system for direct reprogramming of multiple somatic cell types. *Nat Biotechnol* 26, 916-924.
